# Supplementary material for: Borneol-Modified Chitosan Coating with Antibacterial Properties via Layer-by-Layer Strategy
Source: MDPI journal article supplement (doi:10.3390/coatings14040381), 2024-03-25
Supplement: s1 [file s1]

Archive with 1 entries (1 files):
- coatings-2875361-supplementary.pdf
